## Gastrocnemius fascicles are shorter and more pennate throughout the first month following acute Achilles tendon rupture

Todd J. Hullfish, Kathryn M O'Connor, Josh R. Baxter

Department of Orthopaedic Surgery, University of Pennsylvania, Philadelphia, PA, USA

Corresponding Author:

Josh Baxter

3737 Market Street, Suite 1050, Philadelphia, PA, USA 19104

Email address: [josh.baxter@uphs.upenn.edu](mailto:josh.baxter@uphs.upenn.edu)

## 1 Abstract

2 The purpose of this study was to characterize the short-term effects of Achilles tendon  
3 ruptures on medial gastrocnemius. We hypothesized that the fascicles of the medial  
4 gastrocnemius muscle of the injured Achilles tendon would be shorter and more pennate  
5 immediately following the injury and would persist throughout 4 weeks post-injury. B-mode  
6 longitudinal ultrasound images of the medial gastrocnemius were acquired in 10 adults who  
7 suffered acute Achilles tendon ruptures and were treated non-operatively. Ultrasound images  
8 were acquired during the initial clinical visit following injury as well as two and four weeks  
9 following this initial clinical visit. Resting muscle structure was characterized by measuring  
10 fascicle length, pennation angle, muscle thickness, and muscle echo intensity in both the injured  
11 and contralateral (control) limbs. Fascicle length was 15% shorter ( $P < 0.001$ ) and pennation  
12 angle was 21% greater ( $P < 0.001$ ) in the injured muscle compared to the uninjured (control)  
13 muscle at the presentation of injury (week 0). These differences in fascicle length and pennation  
14 angle persisted throughout the 4 weeks after the injury ( $P < 0.008$ ). Muscle thickness changes  
15 were not detected at any of the post-injury visits (difference  $< 4\%$ ,  $P > 0.04$ ). Echo intensity of  
16 the injured limb was 8% lower at the presentation of the injury and 11% lower ( $P = 0.008$ ) than  
17 the contralateral muscle at 2 weeks following injury ( $P < 0.001$ ) but returned to within 1% by 4  
18 weeks ( $P = 0.393$ ). Our results suggest that Achilles tendon ruptures elicit rapid changes in the  
19 configuration and quality of the medial gastrocnemius, which may explain long-term functional  
20 deficits.

## 21 Introduction

22 The incidence of Achilles tendon ruptures has increased 10-fold over the last three  
23 decades, disproportionately affecting athletic adults who participate in sports requiring sudden  
24 acceleration and jumping (Lantto et al., 2015). This well-documented increase in the prevalence  
25 of acute Achilles tendon ruptures (Nyyssönen, Lüthje & Kröger, 2008; Huttunen et al., 2014;  
26 Lantto et al., 2015) is most likely explained by the recent rise in sports participation amongst  
27 aging adults (Huttunen et al., 2014). While advances in rehabilitation protocols have improved  
28 outcomes in patients treated either operatively or non-operatively (Willits et al., 2010),  
29 approximately one out of five patients without other complications are unable to return to their  
30 previous levels of athletic participation (Zellers, Carmont & Silbernagel, 2016) and two out of  
31 three have long-term functional deficits (Brorsson et al., 2017).

32 Deficits in plantarflexion function of the affected limb play a large role in preventing  
33 return to pre-injury levels of activity (Olsson et al., 2011) and have been shown to persist as far  
34 out as 14-years following injury (Heikkinen et al., 2016; Brorsson et al., 2018). Clinically, these  
35 deficits present as resting ankle angles that are less plantarflexed (Zellers, Carmont &  
36 Silbernagel, 2018), reduced heel-raise height (Silbernagel, Steele & Manal, 2012; Brorsson et al.,  
37 2017), and 10-20% reductions in plantarflexion strength (Leppilahti et al., 2000; Pajala et al.,  
38 2009; Heikkinen et al., 2016). Tendon elongation and plantarflexor muscle atrophy have both  
39 been associated with these reductions in function (Mullaney et al., 2006; Silbernagel, Steele &  
40 Manal, 2012; Heikkinen et al., 2017a). Decreased resting tension in the muscle-tendon unit  
41 stimulates sarcomere subtraction in small animals (Williams & Goldspink, 1978; Williams,  
42 1990), effectively restoring the resting tension in the muscle. Both increased tendon length and

43 decreased muscle fascicle length have been shown to negatively affect single-leg heel raise  
44 performance in computational simulations (Baxter, Farber & Hast, 2018).

45 Plantarflexor function is governed by muscle-tendon structure. Although isometric  
46 strength is a commonly measured metric of patient function and correlates with muscle size and  
47 leverage (Baxter & Piazza, 2014), athletics require active plantarflexor shortening to generate  
48 ankle power (Lee & Piazza, 2009). Longer muscle fascicles generate greater power at high  
49 speeds, which is beneficial for activities like sprinting (Lee & Piazza, 2009). Targeted training  
50 can increase muscle fascicle length (Salzano et al., 2018), effectively increasing power potential.  
51 Although muscle structure has been linked to function in many populations, shorter muscle  
52 fascicles have only been reported in a single case report of a patient with poor outcomes  
53 following an Achilles tendon rupture (Baxter, Hullfish & Chao, 2018).

54 Sudden changes in muscle-tendon tension, either induced through joint immobilization  
55 (Williams & Goldspink, 1978; Williams, 1990) or changes in muscle leverage (Burkholder &  
56 Lieber, 1998; Koh & Herzog, 1998), stimulate changes in muscle fascicle length within weeks.  
57 While a previous report documented muscle remodeling 3 to 6 months following acute Achilles  
58 tendon ruptures (Peng et al., 2017), the response to an immediate loss of muscle-tendon tension  
59 caused by Achilles tendon ruptures has not been prospectively studied in a patient cohort. Other  
60 studies have found that 3-weeks of immobilization stimulates decreases in muscle strength by as  
61 much as one-half in humans (Hortobágyi et al., 2000) and muscle remodeling characterized by a  
62 25% decrease in serial sarcomere count (Williams & Goldspink, 1978).

63 Therefore, the purpose of this study was to quantify the immediate structural changes to  
64 the medial gastrocnemius in patients who suffered acute Achilles tendon ruptures and were  
65 treated non-operatively. We decided to study the medial gastrocnemius muscle because our  
66 previous work found large changes in its structure that explained long-term functional deficits  
67 (Baxter, Hullfish & Chao, 2018). We hypothesized that the medial gastrocnemius muscle would  
68 have shorter and more pennate fascicles immediately following an acute Achilles tendon rupture  
69 and these changes would persist throughout 4 weeks post-injury. Based on previous reports  
70 (Williams & Goldspink, 1978; Hortobágyi et al., 2000), we expected that changes in muscle  
71 structure following acute Achilles tendon rupture should be detected within the first 4 weeks  
72 following injury.

## 73 Methods

### 74 Study Design

75 Ten adults (9 males, Age:  $44 \pm 12$ ; BMI:  $28.6 \pm 6.5$ ) who suffered acute Achilles tendon  
76 ruptures (7 suffered during sports) and were treated non-operatively by a fellowship trained foot  
77 and ankle surgeon and provided written-informed consent in this study approved by the  
78 University of Pennsylvania IRB (828374). All subjects were recruited from the clinics of the  
79 Department of Orthopaedic Surgery at the Penn Medicine and met several inclusion criteria:  
80 patient was between 18 and 65 years old, elected to be treated non-operatively for acute Achilles  
81 tendon rupture within 2 weeks of injury. Subjects were not enrolled in this study if they met any  
82 of our exclusion criteria: excessive weight (BMI < 50) or concomitant lower extremity injuries.  
83 We acquired ultrasound images of the medial gastrocnemius during three clinical visits (**Figure**  
84 **1**): time of injury when subjects were placed in a cast (week 0); time of cast removal when  
85 subjects were transitioned into partial weight bearing in a walking boot (week 2); and 2 weeks

86 after transitioning into boot use (week 4). Patients were enrolled in this study within 10 days of  
87 suffering the injury ( $4.5 \pm 3.5$  days), at which the week 0 images were acquired. We imaged the  
88 contralateral limb at week 0, which served as a control for all subjects. We imaged the affected  
89 limb at each time point and compared to the control muscle to determine changes in resting  
90 muscle structure. Resting structure of the muscle was characterized by the length and pennation  
91 angle of the constituent fascicles as well as the thickness of the muscle belly. We also performed  
92 a secondary analysis of average muscle echo intensity to characterize ‘muscle quality’, which  
93 may be a surrogate measure of muscle remodeling and atrophy (Fukumoto et al., 2012).

## 94 Image Acquisition

95 Longitudinal images of the medial gastrocnemius (**Figure 2**) were acquired while  
96 subjects lay prone on a treatment table with their feet and ankles supported by the edge of the  
97 table in plantarflexion and kept in the same position for all imaging sessions. At the beginning of  
98 each imaging session, subjects lay on the treatment table with their ankles resting off the edge of  
99 the table (Zellers, Carmont & Silbernagel, 2018). We have used this resting angle previously to  
100 longitudinally study Achilles tendon structure (Hagan et al., 2018). In order to minimize the  
101 loads applied to the healing tendon, the subjects slid proximally on the table to support both  
102 ankles in the resting position of the uninjured limb. Continuous B-mode ultrasound images of the  
103 medial gastrocnemius were acquired by a single investigator using an 8 MHz ultrasound  
104 transducer with a 6 cm scanning width (LV7.5/60/128Z-2, SmartUs, TELEMED). We followed  
105 the guidelines for reliably imaging medial gastrocnemius muscles outlined by Bolsterlee et al.  
106 (2016). Briefly, we positioned the probe half way between the muscle-tendon junction and crease  
107 of the knee in the central portion of the muscle belly and aligned with the fascicles to ensure that  
108 the muscle fascicles lie in the image plane. During pilot testing, we identified scanning  
109 parameters (scan parameters: Dynamic Range: 72 dB; Frequency: 8 MHz; Gain: 47 dB) that  
110 produced high-contrast images and held them constant for all subjects and scanning sessions. We  
111 also confirmed during pilot testing that imaging along the midline of the muscle belly produced  
112 similar measurements of fascicle length and pennation angle. Specifically, imaging the central,  
113 medial, lateral, medial-central, and latera-central regions of the muscle resulted in similar  
114 measurements of fascicle length (standard deviation < 1.5mm) and pennation angle (standard  
115 deviation < 1 degree).

116 All images were acquired by the same investigator and saved as digital videos to be  
117 processed later by the same investigator. During each imaging session, the investigator pressed a  
118 foot switch when the ultrasound image produced fascicles that were in plane in order to analyze  
119 these specific frames during post-processing. These individual frames from the continuous  
120 imaging were exported as still images to be processed for muscle structure. In order to protect  
121 the rupture, we acquired images with the foot fully supported in plantarflexion. During the first  
122 study visit (week 0), the Achilles tendon did not transfer any load, which was confirmed by  
123 moving the ankle joint while observing no change in muscle structure via real-time ultrasound  
124 imaging. Because of this observation, we considered the first visit scans of the injured muscle,  
125 which were acquired on average 4.5 days after injury, to accurately represent muscle structure  
126 immediately following the rupture. To confirm that probe placement was repeatable between  
127 sessions, we imaged the contralateral (control) muscle at each visit and found that these  
128 measurements of muscle architecture had coefficients of variation of less than 10% and intra  
129 class correlations greater than 0.84 (Supplemental Material). These metrics of reliability agree  
130 with previous reports in the literature (Kwah et al., 2013).

## 131 Image Analysis

132 Resting fascicle length, pennation angle, muscle thickness, and muscle echo intensity  
133 were quantified using custom written software (MATLAB 2017b, The MathWorks, Inc, Natick,  
134 MA) (Baxter, Hullfish & Chao, 2018). We anonymized and randomized each image to ensure  
135 that the investigator analyzing the images could not be biased. For each image, the investigator  
136 identified the deep and superficial aponeuroses as well as a single fascicle (**Figure 2**). We  
137 quantified fascicle length as the distance between the fascicle's insertions into the aponeuroses.  
138 Pennation angle was determined to be the angle between the fascicle and the deep  
139 aponeuroses. Muscle thickness was calculated based on fascicle length and pennation angle  
140 (**Equation 1**). During this analysis, we observed that many of the ultrasound images showed the  
141 muscle to be of 'poor quality', which was visually apparent based on reduced contrast between  
142 muscle fascicle and interstitial connective tissue (**Figure 2b**). Therefore, we calculated the mean  
143 echo intensity between deep and superficial aponeuroses to quantify muscle quality. Because we  
144 acquired all ultrasound images with the same scanning parameters, we used the raw echo  
145 intensity values that ranged between 0 and 255. A previous study correlated muscle strength with  
146 mean echo intensity and attributed this link between muscle form and function to increased  
147 fibrous and adipose tissues within the muscle belly (Fukumoto et al., 2012).

148 **Eq. 1.**  $thickness = l_{fascicle} \times \sin \theta_{pennation}$

## 149 Statistical Analysis

150 To test our hypothesis that resting muscle architecture would change following injury,  
151 resting fascicle length, pennation angle, muscle thickness, and mean echo intensity at week 0, 2,  
152 and 4 were each compared to against the control values using paired one-way t-tests. We  
153 adjusted for multiple comparisons using a Bonferroni correction, which set the threshold for  
154 statistical significance to  $p = 0.05 / 3 = 0.0167$ , where 3 is the number of comparisons for each  
155 variable of interest. When muscle structure parameters differed from the control values, we  
156 calculated the Cohen's effect size ( $d$ ). We performed an *a priori* sample size calculation based on  
157 the variation of medial gastrocnemius fascicle length in young adults (Baxter & Piazza, 2014)  
158 and determined that 10 subjects would be able to detect a 10% decrease with desired statistical  
159 power of 0.8.

## 160 Results

161 Gastrocnemius muscle structure following an acute Achilles tendon rupture differed with  
162 the healthy-contralateral muscle throughout the first four weeks following injury (**Figure 3**).  
163 Fascicle length was 15% shorter ( $d = 1.7, P < 0.001$ ) and pennation angle was 21% greater ( $d =$   
164  $1.6, P < 0.001$ ) at the presentation of injury (week 0). These differences in fascicle length ( $d >$   
165  $1.6, P < 0.001$ ) and pennation angle persisted throughout the 4 weeks after the injury ( $d > 0.9, P$   
166  $< 0.008$ ). Muscle thickness changes were not detected at any of the post-injury visits; however, a  
167 3% decrease in muscle thickness at week 4 approached our threshold for significance when  
168 controlling for multiple comparisons ( $d = 0.62, P = 0.041$ ). Muscle quality, measured as mean  
169 echo intensity of the muscle belly, was 8% lower in the injured limb immediately ( $d = 0.9, P =$   
170  $0.008$ ) and 11% lower 2 weeks following injury ( $d = 1.5, P < 0.001$ ). At week 4 muscle quality  
171 had returned to within 1% of the contralateral limb ( $P = 0.393$ ).

## 172 Discussion

173 The purpose of this study was to quantify medial gastrocnemius structure following the  
174 first month of acute Achilles tendon ruptures. Our findings support our hypothesis that the  
175 gastrocnemius muscle fascicles of the affected side would demonstrate shorter length and greater  
176 pennation angle than the contralateral control muscle. These changes appear to be a mechanical  
177 response to a sudden loss of intra-muscular tension – typically present with an intact tendon  
178 (Hug et al., 2013) – that likely stimulates biological remodeling of the serial sarcomeres  
179 observed in immobilization studies (Williams & Goldspink, 1978). We confirmed that no load  
180 was carried between the Achilles tendon and gastrocnemius following injury by manually  
181 rotating the ankle while observing no change in muscle fascicle length or pennation angle via  
182 real-time ultrasound imaging. Our report is the first to our knowledge to document  
183 gastrocnemius remodeling within the first month following an Achilles tendon rupture.

184 Our measurements of medial gastrocnemius structure compared favorably with prior  
185 reports. Due to the clinical constraints of these patients, we were required to image the muscle of  
186 the injured side with the foot supported in maximal plantarflexion by a table. As expected, our  
187 measurements of gastrocnemius structure were shorter and more pennate than compared to other  
188 studies that have measured gastrocnemius structure at neutral ankle angle (Lee & Piazza, 2009;  
189 Baxter & Piazza, 2014). Unlike these previous studies, we measured muscle architecture with the  
190 ankle fully supported in plantarflexion to protect the healing tendon. As expected, our  
191 measurements of fascicle length and pennation angle were similar to a previous report of  
192 gastrocnemius structure in peak plantarflexion (Gao et al., 2009), which demonstrated a linear  
193 decrease in fascicle length and increase in pennation angle with increasing plantarflexion angle.  
194 We calculated muscle thickness using a single longitudinal scan of the muscle belly rather than a  
195 transverse scan or multiple longitudinal scans at different locations. Using this imaging  
196 approach, we detected a small (3%) decrease in muscle thickness at week 4 that approached  
197 statistical significance ( $P = 0.041$ ). This small decrease in muscle thickness was less than  
198 previous reports of muscle atrophy at least 1 year following injury (Heikkinen et al., 2017a,b).  
199 Our findings that resting fascicle length decreases following Achilles tendon rupture also  
200 compare favorably with a previous report that found fascicle length decreases by 20% 3-6  
201 months after Achilles tendon ruptures were surgically repaired (Peng et al., 2017). Decreases in  
202 muscle quality have been associated with age-related muscle deterioration such as sarcopenia  
203 (Fukumoto et al., 2012), but these changes have not been observed in muscle following tendon  
204 rupture. Side to side differences in rectus femoris fascicle length, pennation angle, thickness, and  
205 echo intensity have been reported to be less than 11% (Mangine et al., 2014). However, this  
206 previous study quantified the muscle of elite basketball players that may have had greater muscle  
207 structure asymmetry due to sport specific training and history.

208 Functional deficits are associated with elongated tendon and shorter muscle fascicles  
209 following Achilles tendon rupture. Recent reports and our current findings document changes in  
210 plantarflexor structure that occurs within the first weeks following rupture, persist through 3-6  
211 months (Peng et al., 2017), and appear to lead to permanent muscle remodeling (Baxter, Hullfish  
212 & Chao, 2018). Tendon elongation has been identified as a key clinical measure that explains  
213 long-term deficits in function (Silbernagel, Steele & Manal, 2012; Brorsson et al., 2017). When  
214 considered in this context, our current findings of shorter and more pennate gastrocnemius  
215 fascicles immediately following Achilles tendon rupture indicate a coupled remodeling response  
216 with the healing tendon. (Suydam et al., 2015) Imaging studies of the healing Achilles tendon

217 show continued tendon elongation (Nyström & Holmlund, 1983; Mortensen, Skov & Jensen,  
218 1999; Kangas et al., 2007), which suggests that muscle-tendon adaptations continue for several  
219 months following the injury. We hypothesize that the initial tendon injury mechanically unloads  
220 the muscle that stimulates a rapid change in muscle structure in an attempt to restore the optimal  
221 resting tension in the muscle-tendon unit (Williams & Goldspink, 1978), which potentially  
222 triggers a positive feedback loop. Prospective research is needed to directly link the interaction  
223 between tendon elongation and muscle remodeling. Understanding the progression of this  
224 remodeling process is crucial for the treatment of tendon injuries and can be used to inform  
225 clinical decisions as well as the prescription of rehabilitation protocols. Although tendon loading  
226 is restricted during the first month following injury, shorter and more pennate muscle fascicles  
227 may lead to increased muscle-tendon tension and drive additional tendon elongation (Kangas et  
228 al., 2007).

229 In addition to our current findings that skeletal muscle architecture is sensitive to tendon  
230 rupture, muscle fascicle length can also be affected by loading, pathology, surgical procedures,  
231 and immobilization in both humans and animal models. High-acceleration training during  
232 maturation in guinea fowl stimulates longer muscle fascicles that contain greater amounts of  
233 sarcomeres in series (Salzano et al., 2018). Children with cerebral palsy have shorter  
234 gastrocnemius fascicles that can be increased with surgical correction of the plantarflexor  
235 contracture (Wren et al., 2010). Increasing the muscle shortening demands by surgically  
236 releasing the ankle retinaculum elicits rapid sarcomere subtraction in both mice (Burkholder &  
237 Lieber, 1998) and rabbits (Koh & Herzog, 1998). Immobilizing the ankle joint in plantarflexion  
238 elicits muscle fiber remodeling, highlighted by a shorter optimal length and reduced sarcomeres  
239 in series (Williams & Goldspink, 1978; Williams, 1990). Seminal work by Williams (Williams,  
240 1990) demonstrates the importance of muscle tension on muscle length and joint range of motion  
241 in the context of immobilization. Achilles tendon ruptures have been associated with muscle  
242 atrophy (Rosso et al., 2013; Heikkinen et al., 2017a); however, we did not quantify any decreases  
243 in muscle thickness throughout the 4 weeks following the injury. While our measurements of  
244 pennation angle made during the first two weeks following injury demonstrate large increases in  
245 pennation angle (effect size > 1.5), the 95% confidence intervals at 4 weeks suggests that the  
246 muscle pennation angle decreased. These observations agree with previous reports that found no  
247 difference in pennation angle at 6 months between the injured and uninjured sides (Peng et al.,  
248 2017). This improvement in pennation angle may be due to increased weight bearing when  
249 patients transition from the full-leg cast to the walking boot. However, additional research is  
250 required to fully understand the tendon loading biomechanics during ambulation in these two  
251 protective devices. While our study was not designed to quantify muscle volume, it is plausible  
252 that atrophy did occur during our time points when considering a shorter muscle belly defined by  
253 shorter and more pennate fascicles.

254 This study had several limitations, which should be considered when interpreting our  
255 findings. We focused on the first 4 weeks following acute Achilles tendon rupture to characterize  
256 structural changes to the skeletal muscle. While this timespan may appear short, previous  
257 immobilization studies in both humans (Hortobágyi et al., 2000) and small animals (Williams &  
258 Goldspink, 1978) have demonstrated that this time scale elicits detectable changes to both  
259 muscle structure and function. This study only tested the effects of non-operatively treated  
260 Achilles tendon ruptures, which limits the implications of our findings to that specific population  
261 of patients. Out of the 10 patients enrolled in this study, only 1 was female, which is consistent

262 with the four to one ratio of male to female patients reported in the literature (Raikin, Garras &  
263 Krapchev, 2013). Due to the loading restrictions in the weeks following the injury, we imaged  
264 the muscle fascicles with the foot in maximal plantarflexion to ensure an unloaded tendon. We  
265 did not perform muscle biopsy or intramuscular sarcomere measurement (Sanchez et al., 2015);  
266 as such, this study was not designed to establish whether optimal sarcomere length was  
267 preserved via sarcomere subtraction or not. However, animal studies that imposed sudden  
268 changes in joint mechanics demonstrates that rapid change in sarcomere number to preserve  
269 optimal sarcomere length (Williams, 1990; Burkholder & Lieber, 1998; Koh & Herzog, 1998).  
270 Additionally, our measurements of ‘muscle quality’ that were quantified by average echo  
271 intensity have been described in the literature (Fukumoto et al., 2012) but should be investigated  
272 further to validate this measurement. We decided to image the medial gastrocnemius, which has  
273 longer and less pennate fascicles than the soleus and generates tension in greater amounts of  
274 plantarflexion (Hirata et al., 2015), which is critical for functional tasks such as heel raises. We  
275 did not measure muscle structure prior to the injury, and therefore it possible that these structural  
276 differences existed prior to the injury. However, muscle atrophy is well reported in this  
277 population (Heikkinen et al., 2017a), suggesting that muscle structure was symmetrical prior to  
278 injury. Controlled experiments using small animal models are needed to test the effects of pre-  
279 injury muscle structure on post-injury remodeling.

280 These findings are a preliminary data set from a larger clinical cohort of patients that  
281 were enrolled in an ongoing 1-year long prospective study. We are closely monitoring muscle  
282 and tendon structure at each clinical visit. Once cleared for activity, we will test plantarflexor  
283 strength and power in these patients using dynamometry and single-leg heel raises (Baxter &  
284 Piazza, 2014; Baxter, Hullfish & Chao, 2018). Prior research also suggests that these structural  
285 changes in muscle are permanent (Baxter, Hullfish & Chao, 2018) and the magnitude of these  
286 changes may be predictive of long-term functional deficits (Silbernagel, Steele & Manal, 2012;  
287 Baxter, Farber & Hast, 2018).

## 288 Conclusions

289 In summary, our findings demonstrate that the medial gastrocnemius muscle undergoes  
290 rapid changes in configuration following an acute Achilles tendon rupture, which may explain  
291 long-term functional deficits in many patients. While the mechanisms governing these changes  
292 remain unclear, small animal studies suggest that perturbations in muscle-tendon tension  
293 stimulate these changes. Future research should be focused on the effects of muscle-tendon  
294 tension on muscle remodeling pathways.

## 295 References

296 Baxter JR, Farber DC, Hast MW. 2018. Plantarflexor fiber length and tendon slack length are the  
297 strongest determinates of simulated single-leg heel raise function. *bioRxiv [preprint]:*415679.  
298 DOI: 10.1101/415679.



- 299 Baxter JR, Hullfish TJ, Chao W. 2018. Functional deficits may be explained by plantarflexor remodeling  
300 following Achilles tendon rupture repair: Preliminary findings. *Journal of Biomechanics* 79:238–  
301 242. DOI: 10.1016/j.jbiomech.2018.08.016.
- 302 Baxter JR, Piazza SJ. 2014. Plantar flexor moment arm and muscle volume predict torque-generating  
303 capacity in young men. *Journal of Applied Physiology* 116:538–44. DOI:  
304 10.1152/jappphysiol.01140.2013.
- 305 Bolsterlee B, Gandevia SC, Herbert RD. 2016. Ultrasound imaging of the human medial gastrocnemius  
306 muscle: how to orient the transducer so that muscle fascicles lie in the image plane. *Journal of*  
307 *Biomechanics* 49:1002–1008. DOI: 10.1016/j.jbiomech.2016.02.014.
- 308 Brorsson A, Grävare Silbernagel K, Olsson N, Nilsson Helander K. 2018. Calf Muscle Performance Deficits  
309 Remain 7 Years After an Achilles Tendon Rupture. *The American Journal of Sports Medicine*  
310 46:470–477. DOI: 10.1177/0363546517737055.
- 311 Brorsson A, Willy RW, Tranberg R, Silbernagel KG. 2017. Heel-Rise Height Deficit 1 Year After Achilles  
312 Tendon Rupture Relates to Changes in Ankle Biomechanics 6 Years After Injury. *The American*  
313 *Journal of Sports Medicine* 45:3060–3068. DOI: 10.1177/0363546517717698.
- 314 Burkholder TJ, Lieber RL. 1998. Sarcomere number adaptation after retinaculum transection in adult  
315 mice. *Journal of Experimental Biology* 201:309–316.
- 316 Fukumoto Y, Ikezoe T, Yamada Y, Tsukagoshi R, Nakamura M, Mori N, Kimura M, Ichihashi N. 2012.  
317 Skeletal muscle quality assessed from echo intensity is associated with muscle strength of  
318 middle-aged and elderly persons. *European Journal of Applied Physiology* 112:1519–1525. DOI:  
319 10.1007/s00421-011-2099-5.
- 320 Gao F, Grant TH, Roth EJ, Zhang LQ. 2009. Changes in Passive Mechanical Properties of the  
321 Gastrocnemius Muscle at the Muscle Fascicle and Joint Levels in Stroke Survivors. *Archives of*  
322 *Physical Medicine and Rehabilitation* 90:819–826. DOI: 10.1016/j.apmr.2008.11.004.

- 323 Hagan KL, Hullfish TJ, Casey E, Baxter JR. 2018. Tendon Structure Quantified using Ultrasound Imaging  
324 Differs Based on Location and Training Type. *Journal of Applied Physiology*. DOI:  
325 10.1152/jappphysiol.00723.2018.
- 326 Heikkinen J, Lantto I, Flinkkila T, Ohtonen P, Niinimäki J, Siira P, Laine V, Leppilahti J. 2017a. Soleus  
327 Atrophy Is Common After the Nonsurgical Treatment of Acute Achilles Tendon Ruptures. *The*  
328 *American Journal of Sports Medicine*:036354651769461–036354651769461. DOI:  
329 10.1177/0363546517694610.
- 330 Heikkinen J, Lantto I, Flinkkilä T, Ohtonen P, Pajala A, Siira P, Leppilahti J. 2016. Augmented Compared  
331 with Nonaugmented Surgical Repair After Total Achilles Rupture: Results of a Prospective  
332 Randomized Trial with Thirteen or More Years of Follow-up. *The Journal of Bone and Joint*  
333 *Surgery* 98:85–92. DOI: 10.2106/JBJS.O.00496.
- 334 Heikkinen J, Lantto I, Piilonen J, Flinkkilä T, Ohtonen P, Siira P, Laine V, Niinimäki J, Pajala A, Leppilahti J.  
335 2017b. Tendon Length, Calf Muscle Atrophy, and Strength Deficit After Acute Achilles Tendon  
336 Rupture: Long-Term Follow-up of Patients in a Previous Study. *The Journal of Bone and Joint*  
337 *Surgery* 99:1509–1515. DOI: 10.2106/JBJS.16.01491.
- 338 Hirata K, Kanehisa H, Miyamoto-Mikami E, Miyamoto N. 2015. Evidence for intermuscle difference in  
339 slack angle in human triceps surae. *Journal of Biomechanics* 48:1210–1213. DOI:  
340 10.1016/j.jbiomech.2015.01.039.
- 341 Hortobágyi T, Dempsey L, Fraser D, Zheng D, Hamilton G, Lambert J, Dohm L. 2000. Changes in muscle  
342 strength, muscle fibre size and myofibrillar gene expression after immobilization and retraining  
343 in humans. *The Journal of Physiology* 524:293–304. DOI: 10.1111/j.1469-7793.2000.00293.x.
- 344 Hug F, Lacourpaille L, Maïsetti O, Nordez A. 2013. Slack length of gastrocnemius medialis and Achilles  
345 tendon occurs at different ankle angles. *Journal of Biomechanics* 46:2534–2538. DOI:  
346 10.1016/j.jbiomech.2013.07.015.

- 347 Huttunen TT, Kannus P, Rolf C, Felländer-Tsai L, Mattila VM. 2014. Acute Achilles Tendon Ruptures:  
348 Incidence of Injury and Surgery in Sweden Between 2001 and 2012. *The American Journal of*  
349 *Sports Medicine* 42:2419–2423. DOI: 10.1177/0363546514540599.
- 350 Kangas J, Pajala A, Ohtonen P, Leppilahti J. 2007. Achilles Tendon Elongation after Rupture Repair: A  
351 Randomized Comparison of 2 Postoperative Regimens. *The American Journal of Sports Medicine*  
352 35:59–64. DOI: 10.1177/0363546506293255.
- 353 Koh TJ, Herzog W. 1998. Excursion is important in regulating sarcomere number in the growing rabbit  
354 tibialis anterior. *The Journal of Physiology* 508:267–280. DOI: 10.1111/j.1469-  
355 7793.1998.267br.x.
- 356 Kwah LK, Pinto RZ, Diong J, Herbert RD. 2013. Reliability and validity of ultrasound measurements of  
357 muscle fascicle length and pennation in humans: a systematic review. *Journal of Applied*  
358 *Physiology* 114:761–769. DOI: 10.1152/jappphysiol.01430.2011.
- 359 Lantto I, Heikkinen J, Flinkkilä T, Ohtonen P, Leppilahti J. 2015. Epidemiology of Achilles tendon ruptures:  
360 increasing incidence over a 33-year period. *Scandinavian Journal of Medicine & Science in Sports*  
361 25:e133-138. DOI: 10.1111/sms.12253.
- 362 Lee SSM, Piazza SJ. 2009. Built for speed: musculoskeletal structure and sprinting ability. *The Journal of*  
363 *experimental biology* 212:3700–3707. DOI: 10.1242/jeb.031096.
- 364 Leppilahti J, Lahde S, Forsman K, Kangas J, Kauranen K, Orava S. 2000. Relationship Between Calf Muscle  
365 Size and Strength after Achilles Rupture Repair. *American Orthopaedic Foot and Ankle Society*.
- 366 Mangine GT, Hoffman JR, Gonzalez AM, Jajtner AR, Scanlon T, Rogowski JP, Wells AJ, Fragala MS, Stout  
367 JR. 2014. Bilateral Differences in Muscle Architecture and Increased Rate of Injury in National  
368 Basketball Association Players. *Journal of Athletic Training* 49:794–799. DOI: 10.4085/1062-  
369 6050-49.3.60.

- 370 Mortensen HM, Skov O, Jensen PE. 1999. Early motion of the ankle after operative treatment of a  
371 rupture of the Achilles tendon. A prospective, randomized clinical and radiographic study. *The*  
372 *Journal of bone and joint surgery. American volume* 81:983–990.
- 373 Mullaney M, McHugh M, Tyler T, Nicholas S, Lee S. 2006. Weakness in End-Range Plantar Flexion After  
374 Achilles Tendon Repair. *The American College of Sports Medicine* 34. DOI:  
375 10.1177/0363546505284186.
- 376 Nyström B, Holmlund D. 1983. Separation of tendon ends after suture of achilles tendon. *Acta*  
377 *orthopaedica Scandinavica* 54:620–621. DOI: 10.3109/17453678308992899.
- 378 Nyysönen T, Lüthje P, Kröger H. 2008. The increasing incidence and difference in sex distribution of  
379 Achilles tendon rupture in Finland in 1987-1999. *Scandinavian Journal of Surgery* 97:272–275.
- 380 Olsson N, Nilsson-Helander K, Karlsson J, Eriksson BI, Thomée R, Faxén E, Silbernagel KG. 2011. Major  
381 functional deficits persist 2 years after acute Achilles tendon rupture. *Knee Surgery, Sports*  
382 *Traumatology, Arthroscopy* 19:1385–1393. DOI: 10.1007/s00167-011-1511-3.
- 383 Pajala A, Kangas J, Siira P, Othonen P, Leppilahti J. 2009. Augmented compared with nonaugmented  
384 surgical repair of a fresh total Achilles tendon rupture. A prospective randomized study. *The*  
385 *Journal of bone and joint surgery. American volume* 91:1092–100. DOI: 10.2106/JBJS.G.01089.
- 386 Peng W-C, Chang Y-P, Chao Y-H, Fu S, Rolf C, Shih TT, Su S-C, Wang H-K. 2017. Morphomechanical  
387 alterations in the medial gastrocnemius muscle in patients with a repaired Achilles tendon:  
388 Associations with outcome measures. *Clinical Biomechanics* 43:50–57. DOI:  
389 10.1016/j.clinbiomech.2017.02.002.
- 390 Raikin SM, Garras DN, Krapchev PV. 2013. Achilles Tendon Injuries in a United States Population. *Foot &*  
391 *Ankle International* 34:475–480. DOI: 10.1177/1071100713477621.
- 392 Rosso C, Vavken P, Polzer C, Buckland DM, Studler U, Weisskopf L, Lottenbach M, Müller AM,  
393 Valderrabano V. 2013. Long-term outcomes of muscle volume and Achilles tendon length after

- 394 Achilles tendon ruptures. *Knee Surgery, Sports Traumatology, Arthroscopy* 21:1369–1377. DOI:  
395 10.1007/s00167-013-2407-1.
- 396 Salzano MQ, Cox SM, Piazza SJ, Rubenson J. 2018. American Society of Biomechanics Journal of  
397 Biomechanics Award 2017: High-acceleration training during growth increases optimal muscle  
398 fascicle lengths in an avian bipedal model. *Journal of Biomechanics* 80:1–7. DOI:  
399 10.1016/j.jbiomech.2018.09.001.
- 400 Sanchez GN, Sinha S, Liske H, Chen X, Nguyen V, Delp SL, Schnitzer MJ. 2015. In Vivo Imaging of Human  
401 Sarcomere Twitch Dynamics in Individual Motor Units. *Neuron* 88:1109–1120. DOI:  
402 10.1016/j.neuron.2015.11.022.
- 403 Silbernagel KG, Steele R, Manal K. 2012. Deficits in Heel-Rise Height and Achilles Tendon Elongation  
404 Occur in Patients Recovering From an Achilles Tendon Rupture. *The American Journal of Sports*  
405 *Medicine* 40:1564–1571. DOI: 10.1177/0363546512447926.
- 406 Suydam SM, Buchanan TS, Manal K, Silbernagel KG. 2015. Compensatory muscle activation caused by  
407 tendon lengthening post-Achilles tendon rupture. *Knee Surgery, Sports Traumatology,*  
408 *Arthroscopy* 23:868–874. DOI: 10.1007/s00167-013-2512-1.
- 409 Williams PE. 1990. Use of intermittent stretch in the prevention of serial sarcomere loss in immobilised  
410 muscle. *Annals of the Rheumatic Diseases* 49:316–317.
- 411 Williams PE, Goldspink G. 1978. Changes in sarcomere length and physiological properties in  
412 immobilized muscle. *Journal of Anatomy* 127:459–468.
- 413 Willits K, Amendola A, Bryant D, Mohtadi NG, Giffin JR, Fowler P, Kean CO, Kirkley A. 2010. Operative  
414 versus Nonoperative Treatment of Acute Achilles Tendon Ruptures: A Multicenter Randomized  
415 Trial Using Accelerated Functional Rehabilitation. *The Journal of Bone & Joint Surgery* 92:2767–  
416 2775. DOI: 10.2106/JBJS.I.01401.

- 417 Wren TAL, Cheatwood AP, Rethlefsen SA, Hara R, Perez FJ, Kay RM. 2010. Achilles Tendon Length and  
418 Medial Gastrocnemius Architecture in Children With Cerebral Palsy and Equinus Gait. *Journal of*  
419 *Pediatric Orthopaedics* 30:479–484. DOI: 10.1097/BPO.0b013e3181e00c80.
- 420 Zellers JA, Carmont MR, Silbernagel KG. 2016. Return to play post-Achilles tendon rupture: a systematic  
421 review and meta-analysis of rate and measures of return to play. *Br J Sports Med* 50:1325–1332.  
422 DOI: 10.1136/bjsports-2016-096106.
- 423 Zellers JA, Carmont MR, Silbernagel KG. 2018. Achilles Tendon Resting Angle Relates to Tendon Length  
424 and Function. *Foot & Ankle International* 39:343–348. DOI: 10.1177/1071100717742372.
- 425
- 426

427 **Figure 1. Study outline.** Patients who suffered acute Achilles tendon ruptures and received non-  
428 operative treatment were enrolled in this prospective study at their initial clinical visit (week 0).  
429 We measured the structure of the medial gastrocnemius muscle on the injured side using  
430 ultrasound at each clinical visit (week 0, 2, and 4) and the contralateral-healthy side (week 0) to  
431 serve as a control. At initial presentation, patients were placed in a plantarflexed cast and were  
432 instructed to avoid any weight bearing. At the two-week follow-up visit, the cast was removed  
433 and patients were placed in an orthopaedic boot with heel wedges to place the foot in  
434 approximately 30 degrees of plantarflexion. Patients were instructed to apply light pressure to the  
435 foot while ambulating with crutches.

436

437 **Figure 2. Ultrasound imaging quantifying muscle structure.** Ultrasound images of the medial  
438 gastrocnemius were acquired and analyzed by the same investigator to quantify resting fascicle  
439 length, pennation angle, thickness, and muscle belly echogenicity. This figure shows a  
440 representative image of both the uninjured (A, control) and injured (B) sides. Fascicle length and  
441 pennation angle was analyzed by the same observer for all trials. Muscle thickness was  
442 calculated as the product of the fascicle length and sine of the pennation angle. During our initial  
443 analyses, we noticed that the injured limb displayed ‘poor quality’ muscle, as noted by a lack of  
444 contrast between the fascicles and interstitial connective tissue.

445

446 **Figure 3. Muscle structure following Achilles tendon rupture.** Medial gastrocnemius structure  
447 was altered following an acute Achilles tendon rupture. Resting fascicle length (A) decreased  
448 while pennation angle (B) increased in similar proportions, which explained the stable muscle  
449 belly thickness (C) following 4 weeks of injury. Muscle echogenicity (D) was 8-11% reduced at  
450 week 0 and 2 before returning to non-injured values at week 4. (\*  $P < 0.0167$ , dashed lines –  
451 95% confidence intervals,  $d$  – Cohen’s effect size,  $\% \Delta$  – percent change from control data).

452

453 **Supplemental Material. Muscle architecture data measured at each study time point and**  
454 **statistical output.** Medial gastrocnemius muscle architecture measurements at each study time  
455 point with ultrasound imaging provided in this spreadsheet. Raw data and statistical outputs are  
456 included for the comparisons between injured limb data at each time point and the contralateral  
457 (control) limb at week 0 (‘Muscle Architecture’ sheet). The reliability of our measurements of the  
458 contralateral (control) limb muscle at each visit shows that the coefficient of variation is below  
459 0.1 and intra class correlations are all very good ( $> 0.84$ ) for all measurements (‘Control  
460 Reliability’ sheet).

461

462

# Ultrasound Imaging - Medial Gastrocnemius Structure

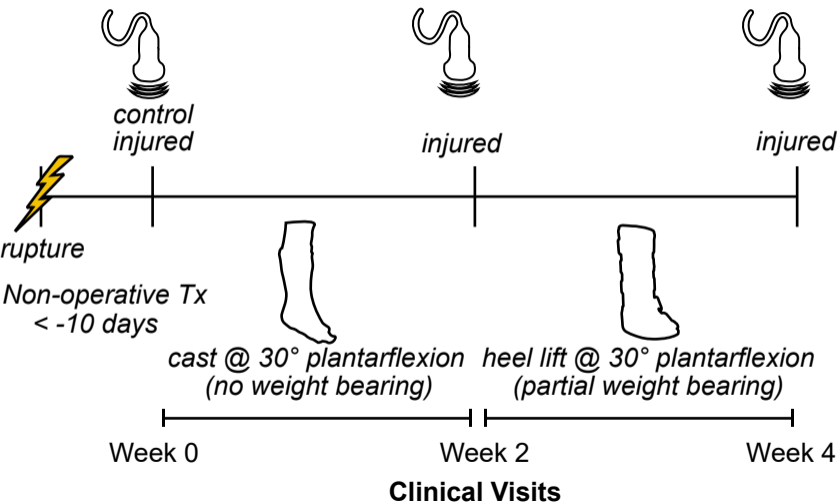



# Medial Gastrocnemius Structure - Initial Presentation

Control

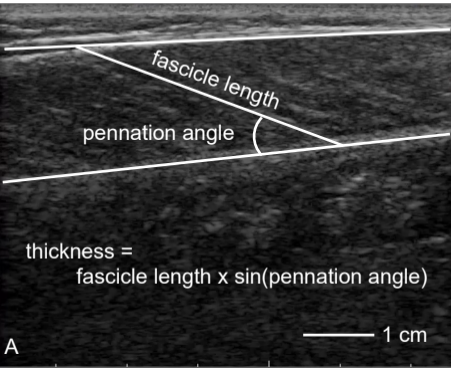

Injured

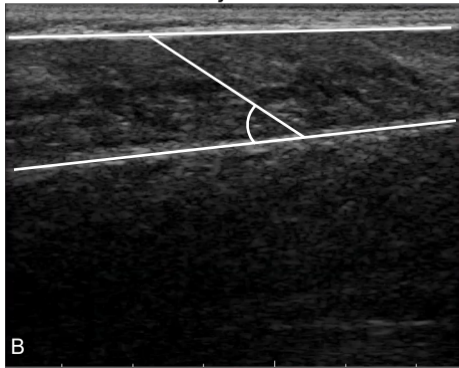

# Medial Gastrocnemius Structure

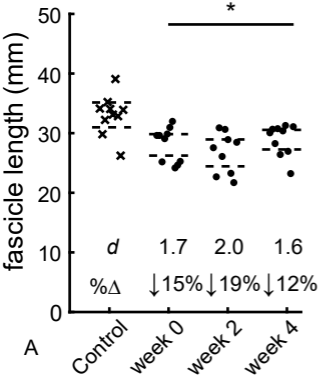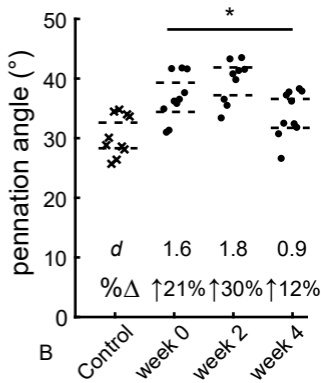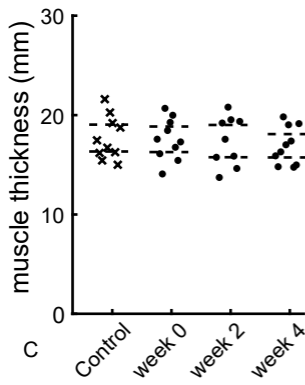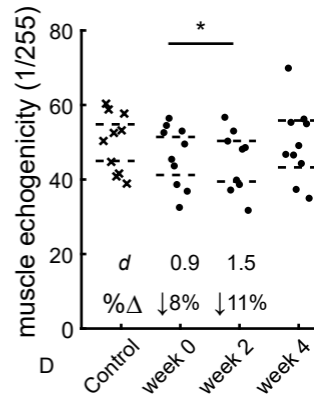

Source: https://www.biorxiv.org/content/10.1101/445569v2.full.pdf
